1  
2  
3  
4  
5  
6  
7  
8  
9  
10  
11  
12  
13  
14  
15  
16  
17  
18  
19  
20  
21  
22  
23  
24  
25  
26  
27  
28  
29  
30  
31  
32

**CARPOOL: A library-based platform to rapidly identify next generation chimeric antigen receptors**

Taeyoon Kyung<sup>1,2,7</sup>, Khloe S. Gordon<sup>1,2,3,7</sup>, Caleb R. Perez<sup>1,2</sup>, Patrick V. Holec<sup>1,2</sup>, Azucena Ramos<sup>1,4</sup>, Angela Q. Zhang<sup>1,5</sup>, Yunpeng Liu<sup>1,4</sup>, Catherine Koch<sup>1,4</sup>, Alina Starchenko<sup>2</sup>, Brian Joughin<sup>2</sup>, Douglas A. Lauffenburger<sup>2,6</sup>, Darrell J. Irvine<sup>1,2,6</sup>, Michael T. Hemann<sup>1,4</sup>, Michael E. Birnbaum<sup>1,2,3,6,\*</sup>

<sup>1</sup> Koch Institute for Integrative Cancer Research, Cambridge, MA, USA.

<sup>2</sup> Department of Biological Engineering, Massachusetts Institute of Technology, Cambridge, MA, USA.

<sup>3</sup> Singapore-MIT Alliance for Research and Technology Centre, Singapore 138602, Singapore

<sup>4</sup> Department of Biology, Massachusetts Institute of Technology, Cambridge, MA, USA.

<sup>5</sup> Department of Health, Science, and Technology, Massachusetts Institute of Technology, Cambridge, MA, USA.

<sup>6</sup> Ragon Institute of MIT, MGH, and Harvard, Cambridge, MA, USA.

<sup>7</sup> These authors contributed equally.

\* e-mail: [mbirnb@mit.edu](mailto:mbirnb@mit.edu)

33 **Abstract (172 words)**

34 CD19-targeted CAR therapies have successfully treated B cell leukemias and lymphomas,  
35 but many responders later relapse or experience toxicities. CAR intracellular domains (ICDs) are  
36 key to converting antigen recognition into anti-tumor effector functions. Despite the many possible  
37 immune signaling domain combinations that could be included in CARs, almost all CARs currently  
38 rely upon CD3 $\zeta$ , CD28, and/or 4-1BB signaling. To explore the signaling potential of CAR ICDs,  
39 we generated a library of 700,000 CD19 CAR molecules with diverse signaling domains and  
40 developed a high throughput screening platform to enable optimization of CAR signaling for anti-  
41 tumor functions. Our strategy identifies CARs with novel signaling domain combinations that elicit  
42 distinct T cell behaviors from a clinically available CAR, including enhanced proliferation and  
43 persistence, lower exhaustion, potent cytotoxicity in an *in vitro* tumor rechallenge condition, and  
44 comparable tumor control *in vivo*. This approach is readily adaptable to numerous disease  
45 models, cell types, and selection conditions, making it a promising tool for rapidly improving  
46 adoptive cell therapies and expanding their utility to new disease indications.

47

48 **Main Text (3410 words)**

49 Cancer immunotherapies that reinvigorate or reprogram anti-tumor T cell responses have  
50 been transformative in the treatment of a broad range of malignancies.<sup>1</sup> Chimeric antigen  
51 receptors (CARs) engineer T cells to leverage these mechanisms by linking intracellular  
52 immunostimulatory signaling domains to extracellular recognition domains typically derived from  
53 antibody single chain variable fragments (scFv). Upon stable introduction into T cells, the CAR  
54 redirects effector functions toward a clinically relevant target antigen. This has been most widely  
55 utilized in the context of B cell malignancies, where a majority of patients show complete  
56 responses within the first few months.<sup>2</sup> However, many patients later relapse, and most patients  
57 experience cytokine release syndrome or neurological impairment.<sup>2</sup> Further, CAR-T treatments  
58 have yet to meaningfully translate to solid tumors, which pose distinct immunological challenges.

59 Retrospective clinical studies have established which CAR T cell phenotypes are  
60 beneficial for long-term efficacy and safety.<sup>2,3</sup> These phenotypes can be induced via the  
61 composition of the CAR signaling domains. While intracellular domains (ICDs) from CD3 $\zeta$  in  
62 combination with CD28 and/or 4-1BB are most commonly used in current CARs,<sup>3,4</sup> several groups  
63 have shown that incorporating novel signaling components can enhance persistence,  
64 proliferation, cytotoxicity, resistance to exhaustion, memory formation, and *in vivo* survival  
65 benefit.<sup>5-7</sup> Additionally, shortening the distance between the CD3 $\zeta$  immunoreceptor tyrosine  
66 activation motifs (ITAMs) and the membrane can enhance their function, and it has been  
67 demonstrated that a CAR containing a single ITAM produced superior persistence and *in vivo*  
68 tumor control than the canonical sequence.<sup>8</sup> The effects of distinct signaling domains can also  
69 synergize when arranged in the optimal spatial configuration.<sup>9-11</sup> While there is a steadily  
70 expanding compendium of CARs utilizing novel signaling domains to confer functions, these  
71 compositions undersample all possible signaling domain combinations that could be beneficial in  
72 CAR constructs, possibly impeding efficacy and translation to other diseases.

73 The relative scarcity of tested signaling domain combinations is a result of the time and  
74 effort needed to individually design and test new CARs. We hypothesized that a more systematic  
75 optimization of CAR signaling domains has the potential to produce novel CAR-T cell behaviors  
76 that could elicit safer, more effective therapies. To this end, we created a 700,000-member CAR  
77 library with diversified ICDs and coupled it with a selection strategy that enables enrichment of  
78 CAR-T cells exhibiting desirable anti-tumor functions (which, together, we term CARPOOL). We  
79 identified several novel CAR ICD combinations, and show that one in particular shows superior  
80 activity relative to a conventional 19BB $\zeta$  CAR (BB $\zeta$ ). Taken together, this evidence suggests that  
81 CARPOOL can rapidly optimize CAR ICDs to enhance therapeutic function and poses a  
82 promising strategy to address current challenges faced by CAR-T therapies.<sup>2</sup>

83

84

## 85 **Results**

86 **CARPOOL streamlines selection of novel high-performance CARs.** In order to design a CAR  
87 library, we identified 89 signaling domains derived from different immune cell types and functional  
88 families (**Supplementary Table 1**), which were then incorporated at random into each of the three  
89 intracellular positions in a 3rd generation CD19 CAR construct. Each CAR was cloned into a  
90 lentiviral transfer vector along with a randomized 18-nucleotide barcode sequence in the 3'UTR,  
91 yielding a theoretical diversity of 700,000 uniquely barcoded signaling domain combinations (**Fig.**  
92 **1a**). We then generated lentiviruses from the CAR plasmid library, and transduced  $1 \times 10^8$  Jurkat  
93 T cells at a multiplicity of infection (MOI) of 0.5 to favor incorporation of a single CAR-encoding  
94 transgene per cell. This produced  $3 \times 10^7$  CAR library transduced cells, as confirmed by epitope  
95 tag staining of the CAR extracellular region, achieving approximately 40-fold coverage of our  
96 theoretical library size.

97 We next FACS sorted for cells EGFP expression, which was bi-cistronically expressed  
98 with each CAR construct. For the first round of selection, we stimulated the EGFP-enriched T cell  
99 pool with 10 nM of soluble human CD19 recombinant protein (a.a. 1-270) (rhCD19) and  
100 subsequently sorted the stimulated EGFP<sup>+</sup> cells that expressed the highest levels of CD69, a  
101 canonical T cell activation marker (CD69<sup>high</sup>).<sup>12,13</sup> We then split this selected population in two in  
102 order to conduct two more rounds of selections in serial for either CD69<sup>high</sup> expression to further  
103 enrich for robustly activatable CARs, or for CD69<sup>high</sup>PD-1<sup>low</sup> expression to potentially identify ICD  
104 combinations that render T cells less susceptible to exhaustion. The proportion of CD69<sup>+</sup> cells  
105 increased substantially throughout rounds of both CD69<sup>high</sup> and CD69<sup>high</sup>PD-1<sup>low</sup> selections,  
106 indicating an enrichment for functional CAR-T cells: 72% and 90% of total cell populations were  
107 EGFP<sup>+</sup>CD69<sup>+</sup> cells after the last round of CD69<sup>high</sup> and CD69<sup>high</sup>PD-1<sup>low</sup> selections, respectively  
108 (**Supplementary Fig. 1**).

109 Next, we performed next-generation sequencing (NGS) to track the prevalence of enriched  
110 barcodes in selected cells from each round of selection. We observed a dramatic reduction in

111 clonal diversity following each round of both CD69<sup>high</sup> and CD69<sup>high</sup>PD-1<sup>low</sup> selections, where the  
 112 top 25 most enriched barcodes represented 89% and 99% of all clones from the last rounds of  
 113 CD69<sup>high</sup> and CD69<sup>high</sup>PD-1<sup>low</sup> selections, respectively (**Supplementary Fig. 2**). Given the limited  
 114 read length capacity of Illumina sequencing, we used PacBio SMRT long-read sequencing of  
 115 amplicons derived from CARPOOL transduced Jurkats that encompass both the CAR ICDs and  
 116 barcode region in order to build a lookup table to link the enriched barcodes to the ICD  
 117 combinations. Of note, only ~70% of barcodes in the top 30 most frequent CARs from all  
 118 selections were identified in the PacBio data, potentially due to read depth limitations in the SMRT  
 119 sequencing. Additionally, not all identified CARs encompassed 3 ICDs as intended, likely due to  
 120 infidelities in the library assembly step (**Fig. 1b**).

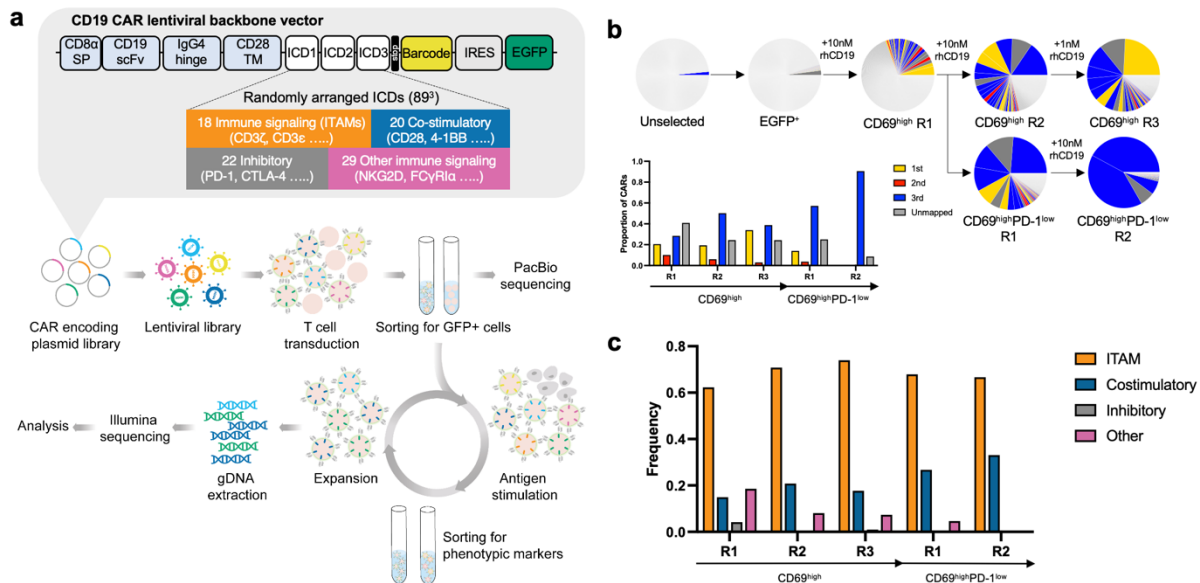

121  
 122 **Figure 1. Selecting for CD69<sup>high</sup> expression enriches CARs encompassing ITAM-signaling ICDs.**  
 123 (a) Schematics describing the CARPOOL system. CARPOOL utilizes a signaling diversified library of  
 124 CD19-specific chimeric antigen receptors containing 1-3 ICDs and combines cell sorting and next  
 125 generation sequencing to select for function in human T cells. All CARs were bi-cistronically expressed  
 126 with EGFP via an IRES sequence. (b) Frequency of top 30 CAR clones throughout rounds of selection  
 127 in Jurkat T cells for CD69<sup>high</sup> and CD69<sup>high</sup>PD-1<sup>low</sup> expression following stimulation with 10 nM rhCD19  
 128 with the proportion of 1st, 2nd, and 3rd generation CARs identified. (c) Frequency of each family of  
 129 ICDs throughout rounds of selection.

130 **Enriched CARs encode ITAM-containing ICDs with unique combinations of costimulatory**  
131 **ICDs.** We quantified the average frequency of each ICD at each selection step to determine which  
132 classes of ICDs were most enriched. Our result verified that ITAM-containing ICDs, which are the  
133 canonical activation motifs for antigen receptor signaling,<sup>14,15</sup> were more prevalent than other  
134 classes of ICDs, especially in later rounds of CD69-based selection, consistent with a requirement  
135 for ITAMs for robust CAR activation (**Fig. 1c**).

136 Analysis of our sequencing data revealed enrichment of novel signaling domains that have  
137 not been vetted for function in a CAR, alongside commonly used ICDs such as CD28 and 41BB  
138 and ICDs that have been more recently described as functional.<sup>7,16–20</sup> However, it is notable that  
139 we identified a BBζ CAR clone in our library that was less enriched compared to our top clones,  
140 especially in the last rounds of both CD69<sup>high</sup> and CD69<sup>high</sup>PD-1<sup>low</sup> selections, indicating that these  
141 novel clones possess competitive advantages over the BBζ CAR in these selection conditions  
142 (**Fig. 2a**). In order to visualize and track the extent of enrichment for each ICD, we generated  
143 heatmaps for each round of selection that depict the frequency of each ICD at each position (**Fig.**  
144 **2b** and **Supplementary Fig. 3**). Furthermore, our analysis suggested that previously  
145 uncharacterized combinations of co-stimulatory and ITAM-containing ICDs, such as FcεR1y, 2B4,  
146 and CD3ε ITAM or CD79b, DAP12, and CD40, were overrepresented following selection relative  
147 to more commonly used signaling domain combinations utilizing 4-1BB, CD28, and CD3ζ (**Fig.**  
148 **2a**). This exemplifies the utility of CARPOOL in revealing useful signaling domain combinations  
149 in a rapid, streamlined process. Notably, our enriched data identified ICDs that are contained in  
150 FDA approved 2nd generation CARs (CD28, 4-1BB, and CD3ζ), as well as domains in clinical  
151 trials or under consideration for novel 2nd and 3rd generation CARs (**Fig. 2b** and **Supplementary**  
152 **Fig. 3**).

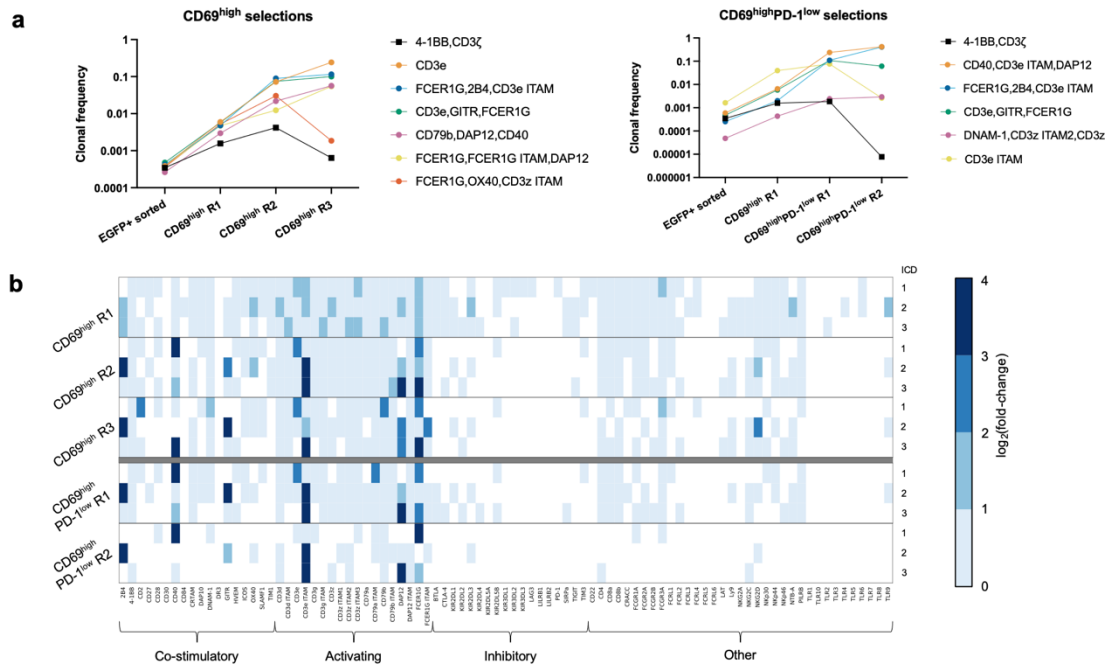

153

154 **Figure 2. CARPOOL selections reveal novel functional signaling domain configurations**  
 155 (a) Clonal frequency of enriched CARs that were identified throughout rounds of CD69<sup>high</sup> and  
 156 CD69<sup>high</sup>PD-1<sup>low</sup> selections compared to a BBζ CAR. (b) Heatmap representing log<sub>2</sub>(fold-change) of  
 157 individual ICDs found in 3rd generation CARs throughout rounds of selection, oriented by ICD position  
 158 within the CAR intracellular domain relative to the plasma membrane.

159 **CAR variants from library selections show distinct functional phenotypes compared to**  
 160 **those of a BBζ CAR in primary T cells.** In order to compare the functional characteristics of our  
 161 novel CARs to those of a BBζ CAR, we vetted 3 highly enriched and distinct CARs in Jurkat T  
 162 cells. While we detected comparable surface expression levels and antigen sensitivity upon  
 163 assessing both CAR internalization and CD69 up-regulation relative to BBζ (**Supplementary Fig.**  
 164 **4a–d**), we noted that the CD69 and PD-1 expression levels of all three variants in the absence of  
 165 antigen engagement were significantly lower than those of the BBζ CAR (**Supplementary Fig.**  
 166 **4e–f**). This indicates that they induce less tonic signaling in Jurkats—a feature that has been  
 167 reported to lead to rapid CAR T cell dysfunction marked by deficient IL-2 and IFN-γ production.<sup>21,22</sup>  
 168 Upon antigen stimulation, we noted that two of the enriched CARs, Var1 and Var3, showed robust

169 CD69 upregulation while Var2 consistently produced lower CD69 upregulation (**Supplementary**  
170 **Fig. 4d**).

171 Thus, we chose to further characterize the two more active hits from our library selections:  
172 Var1 (containing ICDs from CD40, CD3 $\epsilon$  ITAM, and DAP12), which was highly enriched in both  
173 CD69<sup>high</sup> and CD69<sup>high</sup>PD-1<sup>low</sup> selections, and Var3 (containing ICDs from Fc $\epsilon$ R1 $\gamma$ , OX40, and  
174 CD3 $\zeta$  ITAM3), which was enriched in the CD69<sup>high</sup> selection but not in the CD69<sup>high</sup>PD-1<sup>low</sup>  
175 selection (**Fig. 3a**). These were chosen not only for their unique signaling compositions and  
176 relative enrichment, but also to explore whether a PD-1<sup>low</sup> selection criteria enabled identification  
177 of CARs with reduced susceptibility to T cell exhaustion.

178 Given that the range of functional phenotypes following CAR activation is limited in  
179 Jurkats, we next characterized the function of each CAR variant in human primary T cells. While  
180 we did not observe meaningful differences between the CAR variants and BB $\zeta$  in the absence of  
181 antigen (**Supplementary Fig. 5**), we speculated that differences in phenotype between Var1 and  
182 Var3 from BB $\zeta$  may be driven by antigen-induced CAR signaling. CD8<sup>+</sup> T cells expressing Var1,  
183 Var3, and BB $\zeta$  were co-cultured with CD19-expressing NALM6 cells. While we found no  
184 difference in T cell proliferation at day 7 (**Fig. 3b**), there were significant differences in killing  
185 capacity following 24 hour co-culture with NALM6 cells, with Var1 and Var3 exhibiting increased  
186 cytotoxicity compared to BB $\zeta$  across all E:T ratios, and especially at high tumor burden (**Fig. 3c**).  
187 This trend was matched with elevated levels of IL-2 secretion by Var1 at all E:T ratios (**Fig. 3d**),  
188 but with no observed differences in IFN- $\gamma$  secretion (**Supplementary Fig. 6**).

189 To assess whether there were further notable differences in cytokine secretion between  
190 CARs, we conducted a 41-plex Luminex assay using supernatants collected after co-culture of  
191 either CD4<sup>+</sup> or CD8<sup>+</sup> CAR-T cells with NALM6 cells at an E:T ratio of 1:1. We detected increased  
192 secretion of cytokines associated with anti-tumor effects by both Var1 and Var3 relative to BB $\zeta$ ,  
193 such as IL-2, TNF- $\alpha$ , and GM-CSF, in CD8<sup>+</sup> T cells (**Fig. 3e and Supplementary Fig. 7**). In CD4<sup>+</sup>



194 T cells, we found elevated levels of chemokines associated with attracting immune cells from both  
 195 the innate and adaptive immune system compared to BBζ, including MIP1α, MIP1β, and Flt3L in  
 196 the case of Var1 and MIP1α and IP-10 in the case of Var3, indicating that modification of CAR  
 197 signaling can drastically alter their cytokine secretion profiles in T cells.<sup>23–27</sup>

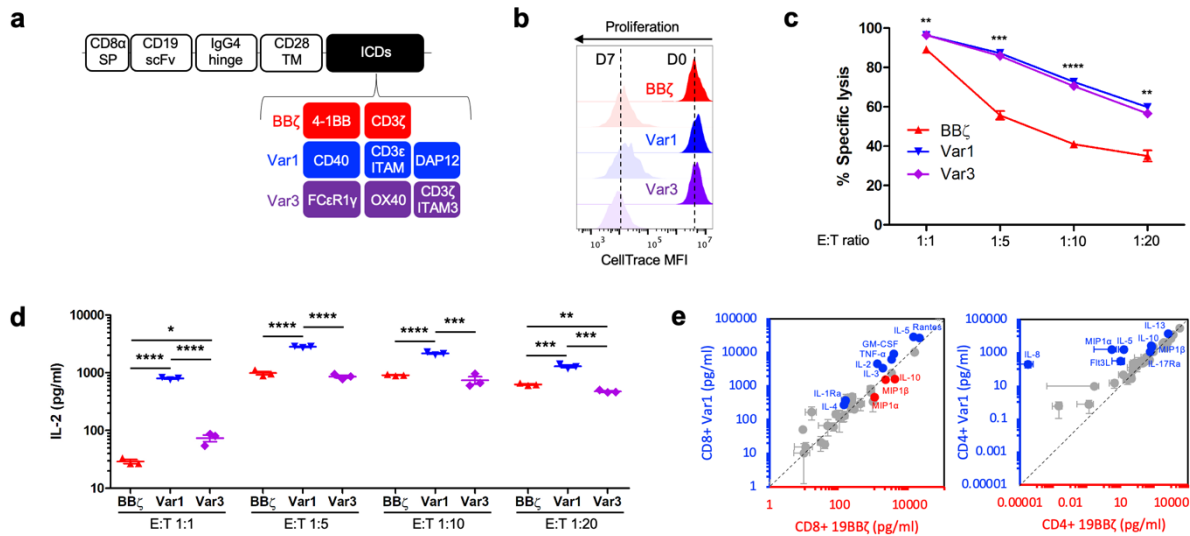

198  
 199 **Figure 3. CAR variants show enhanced cytotoxicity and cytokine secretion in response to**  
 200 **antigen stimulation.** (a) Design of CD19 targeted CAR candidates. (b) Proliferation of human primary  
 201 CD8<sup>+</sup> CAR T cells that were stained with CellTrace dye on day 0 prior to co-culture with CD19<sup>+</sup> NALM6  
 202 cells at an E:T ratio of 1:1 (n = 3 technical replicates representative of 2 biological replicates). Extent  
 203 of proliferation was assessed by degree of dye dilution and measured by FACS. (c) Cytotoxicity and  
 204 (d) IL-2 secretion from human primary CD8<sup>+</sup> CAR T cells following 24 hour co-culture with FLuc<sup>+</sup>  
 205 CD19<sup>+</sup> NALM6 cells at varying E:T ratios (n = 3 technical replicates representative of 2 biological  
 206 replicates). Remaining NALM6 cells were quantified by measuring bioluminescent activity, while IL-2  
 207 levels were measured via ELISA. *P* values in panel (c) are 0.001820, 0.000140, <0.000001, and  
 208 0.001293 for Var1 vs. BBζ and 0.001860, 0.000197, 0.000007, and 0.002098 for Var3 vs. BBζ in  
 209 increasing order of E:T ratio, as determined using a two-tailed unpaired student's t-test with Benjamini-  
 210 Hochberg correction (df = 4 for all). Data and error bars shown are means ± s.e.m. *P* values in panel  
 211 (d) are <0.0001 for Var1 vs. BBζ, 0.0113 for BBζ vs. Var3, and <0.0001 for Var3 vs. BBζ, and 0.0008  
 212 for Var1 vs. Var3 at an E:T of 1:1 ratio (df = 4). *P* values are <0.0001 for Var1 vs. BBζ and <0.0001  
 213 Var1 vs. Var3 at an E:T 1:5 of ratio (df = 4). *P* values are <0.0001 for Var1 vs. BBζ and 0.0004 for  
 214 Var1 vs. Var3 at an E:T of 1:10 ratio (df = 4). *P* values are 0.0007 for Var1 vs. BBζ, 0.0024 for Var3  
 215 vs. BBζ, and 0.0003 for Var1 vs. Var3 at E:T 1:20 ratio (df = 4). *P* values for panel (d) were determined  
 216 using a two-tailed unpaired student's t-test. Data shown are individual points along with means ± s.e.m.  
 217 (e) Polyfunctional cytokine and chemokine secretion response following 24 hour co-culture of human  
 218 primary CD8<sup>+</sup> or CD4<sup>+</sup> CAR T cells (n = 3 technical replicates). Concentrations were quantified for 41  
 219 analytes. Cytokines linked to anti-tumor response that were produced at significantly higher levels by  
 220 the novel CARs relative to 19BBζ are highlighted in blue, while those that were secreted at lower levels  
 221 are highlighted in red.

222 **Var1 CAR-T cells show enhanced persistence and tumor control in a long-term tumor**  
 223 **rechallenge condition.** In order to assess how the enhanced killing and anti-tumor cytokine  
 224 secretion displayed by CARPOOL-enriched CAR variants would affect function over an extended  
 225 period of exposure to high tumor burden, we designed a rechallenge assay in which we repeatedly  
 226 added NALM6 cells every 2-3 days at an E:T ratio of 1:10 to a 1:1 mixture of CD4<sup>+</sup> and CD8<sup>+</sup> T  
 227 cells expressing each CAR (**Fig. 4a**). Under these conditions, we found that Var1-expressing  
 228 CD4<sup>+</sup> and CD8<sup>+</sup> T cells demonstrated considerably more persistent proliferative activity at later  
 229 time points compared to both Var3- and BBζ-expressing cells (**Fig. 4b**). This expansion pattern  
 230 directly correlated with tumor control, with Var1 showing superior tumor control at late timepoints  
 231 (**Fig. 4c**). Var1-expressing cells also showed delayed kinetics of differentiation from T cell memory  
 232 to effector phenotypes along with significantly reduced exhaustion marker expression levels by  
 233 day 22 (**Fig. 4d–e and Supplementary Fig. 8**). Taken together, these results imply that Var1-  
 234 expressing T cells are less susceptible to developing an exhausted T cell phenotype upon  
 235 repeated challenge with high tumor burden relative to Var3 and BBζ CAR-T cells.

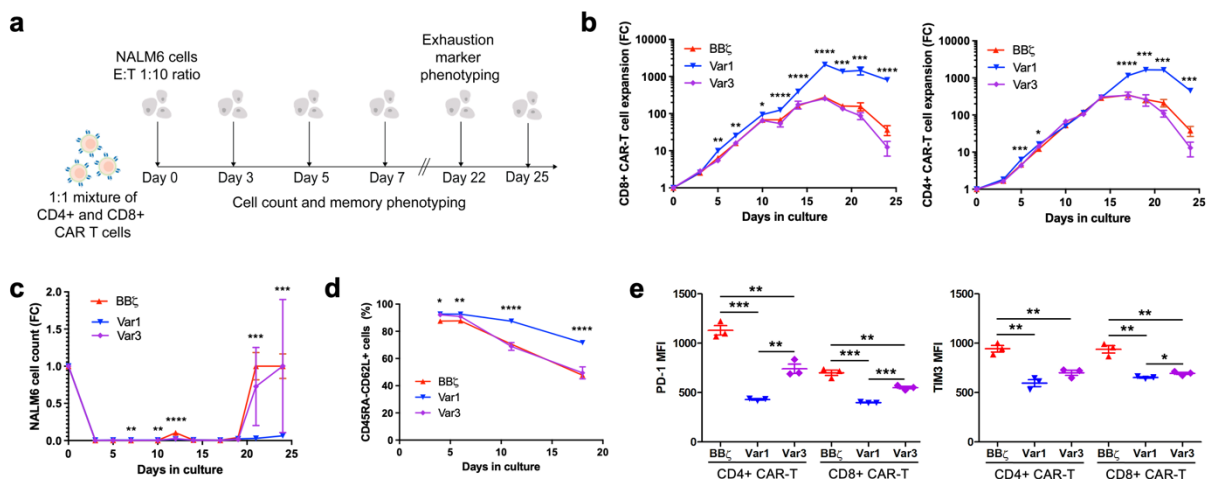

236  
 237 **Figure 4. Var1 demonstrates enhanced persistence and anti-tumor function with lower**  
 238 **exhaustion following long term tumor challenge.** (a) Schematic representation of tumor  
 239 rechallenge assay, in which human primary CD8<sup>+</sup> and CD4<sup>+</sup> CAR expressing T cells mixed in a 1:1  
 240 ratio were stimulated every 2 days with NALM6 cells at an E:T ratio of 1:10. (b) T cells and (c) NALM6  
 241 cells were quantified by FACS at each time point prior to restimulation, along with (d) T cell memory  
 242 differentiation markers (n = 3 technical replicates representative of 2 biological replicates). P values in  
 243 panel (b) are 0.004396, 0.001890, 0.010757, 0.000033, 0.000060, 0.000003, 0.000652, 0.003049,

244 and 0.000080 for Var1 vs. BBζ on days 5, 7, 10, 12, 14, 17, 19, 21, and 24 of rechallenge for CD8+  
245 CAR-T cells. *P* values are 0.000340, 0.010693, 0.000019, 0.000537, 0.000374, and 0.000409 for days  
246 3, 7, 17, 19, 21, and 24 of rechallenge for CD4+ CAR-T cell expansion. *P* values for NALM6 cell  
247 expansion in panel (c) are 0.002063, 0.005311, 0.000043, 0.000790, and 0.000589 for Var1 vs. BBζ  
248 on days 7, 10, 12, 21, and 24 of rechallenge. *P* values for panel (d) are 0.011291, 0.000865, 0.000019,  
249 and 0.000014 for Var1 vs. BBζ for days 4, 6, 11, and 18 of rechallenge. All *P* values for panels (b)-(d)  
250 were determined by multiple two-sided unpaired student's *t* tests with Benjamini-Hochberg correction  
251 (df = 4 for all). Data shown are means ± s.e.m. (e) Exhaustion marker expression of CD4+ and CD8+  
252 CAR-T cells on day 22 of rechallenge (n = 3 technical replicates representative of 2 biological  
253 replicates). *P* values are 0.0001 for CD4+ Var1 vs. BBζ, 0.0041 for CD4+ Var3 vs. BBζ, 0.0028 for  
254 CD4+ Var1 vs. Var3, 0.0004 for CD8+ Var1 vs. BBζ, 0.0080 for Var3 vs. BBζ, and 0.0004 for CD8+  
255 Var1 vs. Var3 for PD-1. *P* values are 0.0019 for CD4+ Var1 vs. BBζ, 0.0042 for CD4+ Var3 vs. BBζ,  
256 0.0017 for CD8+ Var1 vs. BBζ, 0.0034 for CD8+ Var3 vs. BBζ, and 0.0386 for CD8+ Var1 vs. Var3 for  
257 TIM3. *P* values were determined using a two-tailed unpaired student's *t*-test (df = 4). Data shown are  
258 individual points along with means ± s.e.m.

259 **Var1 induces a unique transcriptional profile associated with T cell activation and**  
260 **persistence.** Given that the variant CARs exhibited unique functional phenotypes relative to BBζ  
261 *in vitro*, we asked whether the signaling perturbations introduced by the ICD combinations in Var1  
262 and Var3 produced unique transcriptional programs in response to tumor challenge. We subjected  
263 primary CD4+ and CD8+ T cells expressing each construct to three high-burden NALM6  
264 challenges at an E:T ratio of 1:10 over a five-day period (on days 0, 3, and 5) before performing  
265 single-cell RNA-sequencing (scRNA-seq) 48 hours after the third tumor challenge. Dimensionality  
266 reduction and unsupervised clustering revealed five transcriptionally distinct cell clusters (**Fig.**  
267 **5a**). While CD4+ and CD8+ cells cluster together to some extent (**Supplementary Fig. 9**), the  
268 separation between clusters was mainly defined by CAR variant, with Var1-expressing cells  
269 confined primarily to C0 and C1, and BBζ- and Var3-expressing cells localized to C2, C3, and C4  
270 (**Fig. 5a**); notably, all CAR-expressing cells also clustered separately from unstimulated,  
271 untransduced controls (**Supplementary Fig. 10**). Chi-squared analysis confirmed significant  
272 enrichment of Var1 cells in C0 and C1, while the distribution of BBζ and Var3 cells were  
273 indistinguishable (**Fig 5b**), suggesting that the Var1 construct drives a unique transcriptional  
274 phenotype following repeated high-burden tumor challenge.

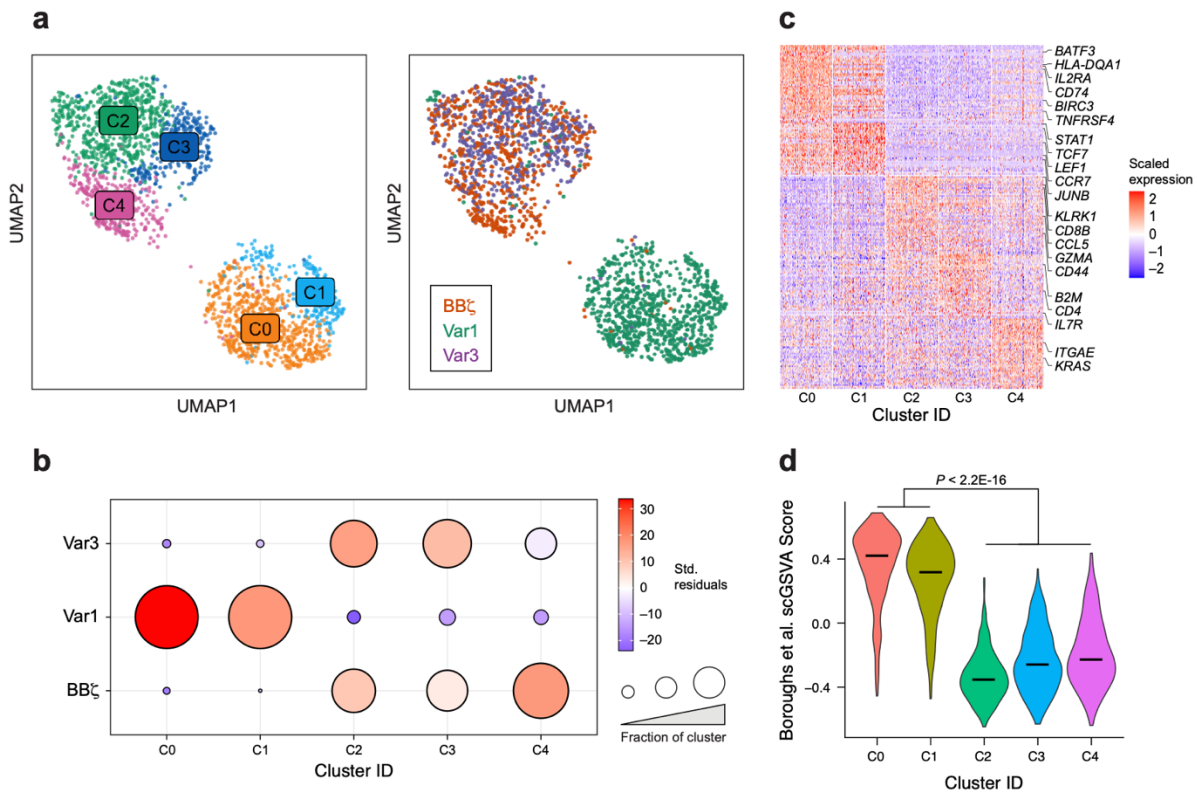

275  
276 **Figure 5. Var1 upregulates transcription of genes involved in T cell persistence following tumor**  
277 **rechallenge.** (a) UMAP embeddings of merged scRNA-seq profiles following rechallenge of human  
278 primary CD8<sup>+</sup> and CD4<sup>+</sup> CAR T cells (mixed in a 1:1 ratio) with NALM6 cells three times at an E:T ratio  
279 of 1:10 colored by cell state (left) and CAR identity (right) (n = 2,082 cells). (b) Chi-square enrichment  
280 values for each CAR candidate within each cluster, represented by the Pearson residuals measuring  
281 the difference between the observed and expected CAR frequencies within each cluster (df = 8). (c)  
282 Heat map representing the normalized expression of the top 50 differentially expressed genes within  
283 each cluster, as determined by Wilcoxon-Rank Sum test with Bonferroni correction. (d) Single-cell  
284 gene set variation analysis (scGSVA) scores measuring enrichment of a previously published BBζ-  
285 specific gene set<sup>33,46</sup> within each T cell cluster. Bars represent median scGSVA values. P values were  
286 determined using a Wilcoxon-Rank Sum test.

287 To characterize the transcriptional program associated with Var1 signaling, we performed  
288 differential expression analysis to define cluster-specific markers (**Fig 5c** and **Supplementary**  
289 **Table 2**). Among the most significantly overexpressed genes in both C0 and C1 were several  
290 genes related to T cell activation (*IL2RA*, *TNFRSF4*), including a broad repertoire of MHC class  
291 II-related genes (**Supplementary Fig. 11a**). In addition, we observed significant upregulation of  
292 memory markers such as *CCR7*, as well as genes within pathways thought to promote T cell  
293 persistence and memory, including those related to non-canonical NF-κB signaling (*BIRC3*,

294 *TRAF1, NFKB2*<sup>28,29</sup> and AP-1 transcription factors (*BATF3, JUNB*)<sup>30</sup> (**Supplementary Fig. 11b**).  
295 Although the transcriptional profiles defined by C0 and C1 were largely similar, cells within C1  
296 uniquely overexpressed *TCF7* and *LEF1*, which encode for transcription factors thought to be  
297 important for T cell stemness and memory (**Supplementary Fig. 11c**).<sup>31</sup> Similar hits were  
298 observed when directly comparing average expression profiles of Var1 cells to BBζ  
299 (**Supplementary Fig. 12 and Supplementary Table 3**). Considering these differences at the  
300 gene level, we sought to characterize Var1-associated programs at the pathway level; we  
301 employed single-cell gene set variation analysis (scGSVA) to assign scores to each cell within  
302 the dataset on the basis of their relative expression of genes within canonical and curated T cell  
303 gene sets (**Supplementary Table 4**).<sup>32</sup> Interestingly, one of the most significantly upregulated  
304 pathways among Var1-expressing cells was a geneset recently reported to distinguish 19BBζ  
305 CARs from 1928ζ (**Fig. 5d**),<sup>33</sup> suggesting that Var1 might induce similar transcriptional programs  
306 to that of BBζ but to a greater extent. Indeed, orthogonal pathways with minimal gene overlap that  
307 have been separately demonstrated to distinguish BBζ CARs are similarly enriched in C0 and C1  
308 (**Supplementary Fig. 13**).<sup>28,33</sup> Taken together, these results suggest that Var1 triggers a  
309 coordinated transcriptional response that promotes enhanced persistence and long-lived memory  
310 formation relative to BBζ in response to antigen stimulation.

311

312 **Var1 shows comparable activity to that of a BBζ CAR in a leukemia mouse model.** We next  
313 tested whether our novel CARs produced distinct *in vivo* outcomes in the context of a xenograft  
314 mouse model of B cell leukemia. We injected NOD/SCID/IL2R<sup>null</sup> (NSG) mice with 5x10<sup>5</sup>  
315 luciferase-expressing (FLuc<sup>+</sup>) NALM6 cells intravenously followed by treatment with a 1:1 mixture  
316 of untransduced or CAR-expressing CD4<sup>+</sup> and CD8<sup>+</sup> T cells 4 days later (**Fig. 6a**). When treated  
317 with 2x10<sup>5</sup> CARs, Var1-treated mice demonstrated slightly delayed tumor outgrowth and a subtle  
318 but not statistically significant increase in survival compared to BBζ-treated mice, with no

319 discernible signs of toxicity (**Fig. 6b-d and Supplementary Fig. 14-15**). Var3-treated mice  
 320 showed comparable tumor progression relative to BBζ-treated mice. Upon collecting peripheral  
 321 blood on day 27, we detected significantly elevated levels of EGFP<sup>+</sup> CAR T cells in Var3-treated  
 322 mice relative to BBζ-treated mice, while the number of circulating Var1 CARs was significantly  
 323 lower despite producing a similar survival benefit (**Fig. 6e**). All groups of mice exhibited  
 324 comparable levels of CD19<sup>+</sup> NALM6 cells (**Fig. 6f**). We additionally treated mice with a higher  
 325 dose of  $1 \times 10^6$  CARs. While we observed sustained remission across all groups, we noted that  
 326 Var1-treated mice showed delayed tumor control in this paradigm (**Supplementary Fig. 16-17**).

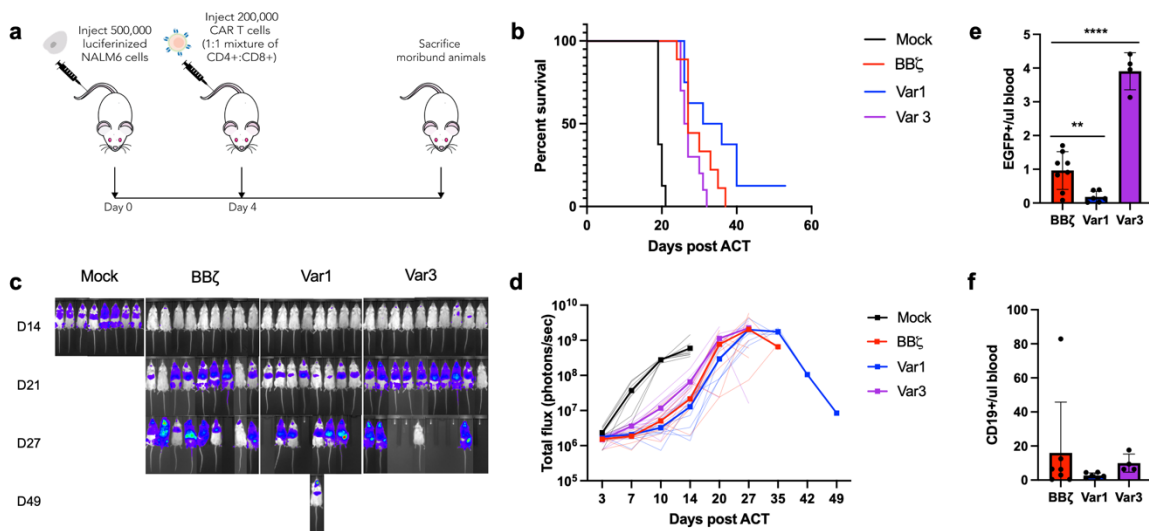

327  
 328 **Figure 6. Variant 1 demonstrates similar tumor control to that of a BBζ CAR *in vivo*.** (a)  
 329 Experimental design: NSG mice were intravenously infused with  $5 \times 10^5$  FLuc<sup>+</sup> CD19<sup>+</sup> NALM6 cells,  
 330 then treated with  $2 \times 10^5$  mixed CD4<sup>+</sup> and CD8<sup>+</sup> (1:1) CAR T cells or untransduced control T cells (n =  
 331 8 mice for untransduced, 9 for BBζ, 8 for Var1, and 10 for Var3). (a) Kaplan-Meier curve for overall  
 332 survival. P values, as determined using a Log-rank test, are 0.1268 for Var1 vs. BBζ and 0.0788 for  
 333 Var3 vs. BBζ (df = 1). Tumor bioluminescence was assessed every 3-7 days by imaging for luciferase  
 334 activity. (c) Representative images and (d) quantification of total photon counts are shown. Data  
 335 shown are individual points along with means in bold. (e) Concentrations of EGFP<sup>+</sup> CAR T cells and  
 336 (d) CD19<sup>+</sup> NALM6 cells in the peripheral blood were determined on day 27 after ACT by FACS (n = 8  
 337 mice for BBζ, 6 for Var1, and 4 for Var3). P values panel (e) are 0.0067 for Var1 vs. BBζ (df = 12) and  
 338 <0.0001 for Var3 vs. BBζ (df = 10). P values were determined using a two-tailed unpaired student's t  
 339 test. Data shown are individual points along with means ± s.e.m.

## 340 Discussion

341 Despite the clinical promise of CAR-T therapies, efforts to improve CAR-T function by  
342 systematically optimizing CAR signaling remain limited. A previous effort successfully identified  
343 functionally signaling CARs from a pool of signaling domains, but was significantly smaller in  
344 scope, had a relatively high false positive rate, and lacked the sequencing analyses necessary to  
345 comprehensively examine any selected variants.<sup>34</sup> Here, we describe CARPOOL, a library-based  
346 functional screening platform for rapidly enriching and identifying novel CARs with clinically useful  
347 phenotypes. As a proof of principle, we constructed a 700,000-member CD19 CAR library with  
348 diverse ICD combinations to discover novel CARs based on their ability to robustly activate Jurkat  
349 T cells. We believe our observations from our selections (**Fig. 1d**) are representative of many  
350 library-based screening approaches: essentially every CAR included at least one ITAM domain  
351 and many contained costimulatory domains, which matches the known rules of CAR design.  
352 However, the selection, covariation, and spatial orientations of each selected construct could not  
353 have been predicted from first principles.

354 When we validated selected CARs, we found that Var1 CARs showed enhanced anti-  
355 tumor activities *in vitro* and comparable tumor control *in vivo* compared to those of the BBζ CAR  
356 currently being used in the clinic. It should be noted that the CD40 and CD3ε ICDs that comprise  
357 the two membrane-proximal ICDs of Var1 were separately reported to enhance CAR-T cell  
358 function, with CD40 augmenting CAR-T effector function and MyD88 and CD3ε promoting CAR-  
359 T cell persistence through Csk and p85 recruitment via the ITAM and basic residue rich sequence  
360 (BRS), respectively.<sup>5,7,35</sup> Additionally, DAP12, the membrane distal ICD of Var1, has been  
361 demonstrated as a functional ICD in both CAR-T and CAR-NK cells.<sup>18,19</sup> While each of these  
362 domains has been examined in isolation, this is the first time they have been collectively  
363 characterized. Further work may uncover the extent to which these signaling inputs synergize  
364 with each other to generate the observed T cell phenotypes.

365 Two key considerations for contextualizing our results are the translation between Jurkat  
366 and primary T cells, and translation to *in vivo* settings. While our study demonstrated that  
367 selections conducted in Jurkat cells can reliably identify novel CARs, there are inherent limitations  
368 to the effector functions that can be selected for due to the physiology of the cell line. Being an  
369 immortalized cell line derived from T cell leukemia, Jurkats continually divide, exhibit altered basal  
370 signaling and metabolism, and are not cytotoxic.<sup>36,37</sup> Therefore, there are desirable T cell  
371 functions such as resistance to exhaustion and efficient tumor killing that cannot be directly  
372 selected for in a Jurkat-based library. The fact that Var1 exhibited many of these phenotypes  
373 despite being selected in Jurkats indicates either these functions correlate with features that can  
374 be selected for in Jurkat cells, or that there are a wide range of emergent properties accessible  
375 simply by altering signaling inputs.

376 Additionally, we consider the differences in results that were observed *in vitro* compared  
377 to those observed *in vivo*. Var1 showed superior function in many *in vitro* assays while appearing  
378 comparable but not significantly superior *in vivo*. Discrepancies in translation between the two  
379 have been well reported.<sup>38-40</sup> These differences are notable in that several of the differences  
380 observed *in vitro* involved either the production of cytokines that would not have function in a  
381 xenograft mouse model, or persistence improvements that may only be relevant upon consistent  
382 antigen exposure. It is therefore possible that the comparable results between Var1 and 19BBζ  
383 are due to commonalities in CAR function or limitations of the *in vivo* model itself.

384 Extending the CARPOOL system for selection in primary T cells would make a broader  
385 range of phenotypes available for use as selection criteria. Doing so could enable the rapid  
386 identification of novel CAR clones that could address existing challenges in translating CAR-T cell  
387 therapies to solid tumor indications, such as lack of persistence due to tumor-mediated  
388 immunosuppression and inefficient trafficking and tumor infiltration<sup>2,41-43</sup>. This may require more  
389 specialized selection strategies, such as employing T cell surface markers indicative of  
390 cytotoxicity, long-lived memory differentiation, and tumor infiltration, in addition to introducing



391 selection conditions that mimic the microenvironment of solid tumors. CARPOOL could also be  
392 adapted to systemically optimize CAR ICD designs for other emerging immune cell therapy  
393 modalities such as CAR-NK cells and CAR-macrophages<sup>44,45</sup>. In summary, CARPOOL presents  
394 a versatile, streamlined method for functionally engineering synthetic receptors for use in immune  
395 cell therapies.

396

## 397 **Methods**

### 398 *Cell lines*

399 HEK293T (CRL-3216) and Clone E6-1 Jurkat (TIB-152) lines were purchased from ATCC, while  
400 Clone G5 NALM6 (CRL-3273) cells were purchased from ATCC and transduced to stably express  
401 firefly luciferase (FLuc) along with a puromycin resistance cassette. Cell lines were routinely  
402 mycoplasma-tested using the MycoAlert PLUS Mycoplasma Detection Kit (Lonza).

403

### 404 *Plasmid construction*

405 The plasmid pHIV-EGFP was gifted by Bryan Welm & Zena Werb (Addgene plasmid #21373)  
406 and pMD2.G and psPAX2 were gifted by Didier Trono (Addgene plasmid #12259 and #12260).  
407 To generate 2nd generation CD19 CAR-EGFP plasmid, a codon optimized gene encoding CD19  
408 CAR composed of Myc-epitope tagged FMC63 scFv, IgG4 hinge, CD28 transmembrane domain,  
409 and intracellular domains derived from human 4-1BB and CD3 $\zeta$  was PCR amplified from  
410 geneblocks purchased from IDT and cloned into the 3rd generation lentiviral vector pHIV-EGFP  
411 using Gibson Assembly. In order to generate a backbone vector for CAR plasmid library, the Myc  
412 epitope tag from CD19 CAR-EGFP plasmid was changed to a Flag epitope tag, and six tyrosine  
413 residues from CD3 $\zeta$  ITAM domains were mutated into phenylalanines to prevent any unmodified  
414 yet functional CARs in the library from contaminating library selections. The signaling diversified  
415 CAR plasmid library was generated by PCR amplification of each intracellular domain  
416 (**Supplementary Table 1**) at each of the 3 positions, with the forward and reverse primers adding

417 unique linkers for each position. These products were then pooled at equimolar ratios for each  
418 position and combined with a pool of randomized 18mer barcode sequences for overlap extension  
419 PCR. These were then inserted into degenerate CD19 CAR backbone vector at PacI and BamHI  
420 restriction enzyme sites to replace the tyrosine mutated BBζ intracellular signaling components  
421 via Gibson Assembly. Final products were electroporated into DH10B electrocompetent E.coli  
422 cells (Thermo Scientific, EC0113) and purified to achieve a highly diverse plasmid library.

423

#### 424 *Lentiviral production*

425 Lentiviruses were generated by first transfecting 70% confluent HEKs with transfer plasmid,  
426 pMD2.g (VSVg), and psPAX2 combined at a plasmid mass ratio of 24:1:3 that was complexed  
427 with PEI at a DNA:PEI mass ratio of 1:3. For a confluent T225 flask, 60 ug of transfer plasmid  
428 was used for transfection. Media was changed 3-6 hours after transfection and lentiviral particles  
429 were harvested in the supernatant 48-120 hours after transfection. The supernatant was then  
430 filtered through a 0.45 um low protein binding filter, and centrifuged for 1.5 hours at 100,000x g.  
431 The pellet was then resuspended in serum-free OptiMEM overnight at 4°C and stored at -80°C.

432

#### 433 *Human T cell activation, transduction, and expansion*

434 Peripheral blood mononuclear cells from healthy donors were purified from buffy coats purchased  
435 from Research Blood Components or leukopaks purchased from Stem Cell Technologies using  
436 Ficoll-Paque PLUS (GE Healthcare) density gradient centrifugation with SepMate tubes (Stem  
437 Cell Technologies) as per manufacturer instructions. Primary CD4+ or CD8+ T cells were isolated  
438 using EasySep Human CD4+ or CD8+ T Cell Enrichment Kits (Stem Cell Technologies) and  
439 cultured in RPMI 1640 (ATCC) supplemented with 10% fetal bovine serum, 100 U/ml penicillin-  
440 streptomycin (Corning), 100 IU/ml recombinant human IL-2 (R&D Systems), and 50 μM beta-  
441 mercaptoethanol (Fisher). Prior to transduction, T cells were activated using a 1:1 ratio of  
442 DynaBeads Human T-Activator CD3/CD28 (Thermo Fisher) for 24 hours, after which 8 μg/mL of

443 polybrene (Santa Cruz Biotechnology) and concentrated lentivirus were added to culture at a  
444 multiplicity of infection of 10 for single lentiviral constructs and 0.5 for pooled library encoding  
445 lentivirus. After 3 days, DynaBeads and lentivirus were removed and cells were sorted for EGFP  
446 using a BD FACSAria II. Cells were rested for 4 days prior to characterization and maintained at  
447 a density of  $5 \times 10^5$ - $2 \times 10^6$  cells/ml throughout this process.

448

#### 449 *Flow cytometry and cell sorting*

450 Cells were washed with 1X PBS (Sigma) supplemented with 0.5% bovine serum albumin (RPI)  
451 and 2 mM EDTA, then surface stained by incubating with antibodies for 15 minutes on ice. They  
452 were subsequently washed again prior to flow analysis on a BD Accuri C6 or Beckman Cytoflex  
453 S or cell sorting with a BD FACSAria II or Sony MA900. Anti-CD4 (clone SK3), anti-CD8 (clone  
454 SK1), anti-PD-1 (clone EH12.2H7), anti-TIM3 (clone F38-2E2), anti-LAG3 (clone 11C3C65), anti-  
455 CD3 (clone OKT3), anti-CD62L (clone DREG-56), anti-CD45RA (clone HI100), and anti-CD69  
456 (clone FN50) antibodies were purchased from Biolegend. Anti-Myc (clone 9B11) and anti-Flag  
457 (D6W5B) antibodies were from Cell Signaling Technology.

458

#### 459 *CAR-T functional selections*

460 In preparation for selections,  $1 \times 10^8$  Jurkat T cells were transduced with lentivirus at an MOI of 0.5  
461 with 8 ug/ml polybrene (Santa Cruz Biotechnology) and spinfected at 1000x g for 1.5 hours at  
462 32°C. Virus was removed after 2 days of transduction and the cells were sorted the following day  
463 for EGFP, with 20x library coverage being maintained based upon the theoretical maximum  
464 diversity from the previous round previously throughout this process. For a round of selection,  
465 cells were stimulated with 1 or 10 nM rhCD19 for 4-6 hours as indicated, then stained for CD69  
466 or CD69 and PD-1 expression. The top 5% T cells as measured by CD69<sup>high</sup> or CD69<sup>high</sup>PD-1<sup>low</sup>  
467 were sorted on a BD FACS Aria II (with at least  $5 \times 10^5$  cells being collected). Cells were then  
468 rested without antigen and expanded for 7 days before subsequent rounds of selection. After

469 each round of selection, at least  $1 \times 10^6$  cells were sampled for NGS sequencing (whereas  $6 \times 10^7$   
470 and  $2 \times 10^7$  cells were sampled for unselected and EGFP sorted groups, respectively). NGS  
471 sequencing data was deconvoluted and analyzed using a custom package called DomainSeq, as  
472 described in the manuscript.

473

#### 474 *In vitro rechallenge assay*

475 CAR-transduced CD4<sup>+</sup> and CD8<sup>+</sup> T cells (50,000 cells each) were mixed at a 1:1 ratio, then co-  
476 cultured with target NALM6 cells at an effector to target (E:T) ratio of 1:10 in IL-2 deficient media.  
477 Every 2-3 days, approximately 10% of the culture volume was taken out for flow analysis and  
478 stained with antibodies targeting CD4, CD8, CD62L, and CD45RA. Then, 100,000 CAR-T cells  
479 were taken out from the original culture and re-plated with a fresh batch of NALM6 cells at a 1:10  
480 E:T ratio. CAR T cells were sampled for scRNA-seq analysis at day 7, which was 48 hours  
481 following the third NALM6 challenge. On day 22, cells were also stained for exhaustion markers  
482 (PD-1, TIM3, and LAG3).

483

#### 484 *Cytotoxicity assay*

485 NALM6 cells expressing firefly luciferase (FLuc) were co-cultured with CD8<sup>+</sup> T cells for 24 hours  
486 in IL-2 deficient media at various E:T ratios. Cells were then harvested and washed prior to cell  
487 lysis and addition of luciferin substrate from the Bright-Glo Luciferase Assay System (Promega).  
488 The resulting luminescent signal was measured using a Tecan Infinite M200 Pro. Signals were  
489 normalized to negative controls containing only target cells.

490

#### 491 *Cytokine secretion assay*

492 Following stimulation of human primary CAR-T cells with NALM6 cells, the concentrations of  
493 human IL-2 and IFN- $\gamma$  were measured using a IL-2 Human Uncoated ELISA Kit (Thermo Fisher)  
494 and IFN- $\gamma$  Human Uncoated ELISA Kit (Invitrogen), respectively. The resulting signal was

495 measured on a Tecan Infinite M200 Pro plate reader, and the concentrations were determined by  
496 comparison to known standards per the manufacturer's instructions. Polyfunctional cytokine and  
497 chemokine secretion profiles in response to tumor challenge were determined using the 41-plex  
498 MILLIPLEX MAP Human Cytokine/Chemokine Magnetic Bead Panel from Miltenyi and measured  
499 on a Luminex FlexMap 3D system.

500

#### 501 *PacBio and Illumina sequencing*

502 Genomic DNA from selected cells was purified using the PureLink Genomic DNA Mini Kit (Thermo  
503 Fisher). For PacBio sequencing, PCR amplicons encoding CAR signaling domains and barcode  
504 regions were attached with SMRTbell adaptors using the SMRTbell Template Prep Kit 1.0 (Pacific  
505 Biosciences) and sequenced using a PacBio Sequel system. For Illumina sequencing, barcode  
506 regions were PCR amplified to conjugate P5 and P7 adaptor sequences and sequenced on an  
507 Illumina MiSeq system.

508

#### 509 *Single-cell sequencing*

510 19BB $\zeta$ , Var1, and Var3-expressing CAR T cells were sampled from NALM6 cocultures, as well  
511 as untransduced, unstimulated T cells. Separately, samples were enriched for live cells using a  
512 Dead Cell Removal (Annexin V) Kit (Stem Cell Technologies), then labeled with unique anti-  
513 human TotalSeq-B hashing antibodies (BioLegend). Following labeling, approximately 2,500 cells  
514 from each of the four samples were pooled before encapsulation in a single channel of the  
515 Chromium Single Cell 3' v3.1 platform (10X Genomics). Gene expression (GEX) libraries were  
516 constructed based on manufacturer instructions, while hashing antibody libraries were  
517 constructed as reported previously.<sup>46</sup> The resulting libraries were pooled at a 1:10 ratio of  
518 antibody-to-GEX before sequencing on an Illumina NextSeq500 to a depth of 60,000 reads per  
519 cell. Reads were aligned to the Genome Reference Consortium Human Build 38 (GRCh38), and  
520 a cell-gene matrix was generated using the CellRanger pipeline (10X Genomics; v4.0.0).

521 Downstream analysis was performed using the Seurat package (v4.0.0).<sup>46,47</sup> In brief, cells were  
522 first assigned sample identity based on the detection of a single hashing antibody following  
523 normalization of antibody reads using the HTODemux algorithm.<sup>46</sup> Next, low-quality cells were  
524 filtered out on the basis of mitochondrial reads (>25%). Filtered data for each cell was normalized  
525 to total expression, and cell cycle-related genes were regressed out using the ScaleData function.  
526 To identify distinct transcriptional states, linear dimensionality reduction was performed on the  
527 scaled, normalized data, followed by shared nearest neighbors clustering on the basis of the first  
528 40 principal components. Differentially expressed genes, both within clusters and across samples,  
529 were identified by a Wilcoxon-Rank Sum test between the populations of interest. For pathway-  
530 level analyses, individual cells were assigned scGSVA scores on the basis of their relative  
531 expression of genes within all canonical pathways, immunologic signature gene sets (Broad  
532 Institute; C2 and C7 gene sets, respectively), or T cell-specific curated pathways (**Supplementary**  
533 **Table 4**), as previously described.<sup>32</sup>

534

#### 535 *Xenogeneic mouse models*

536 All animal studies were performed in accordance with guidelines approved by the MIT Division of  
537 Comparative Medicine and MIT Committee on Animal Care (Institutional Animal Care and Use  
538 Committee). Male NOD/SCID/IL2R<sup>null</sup> (NSG) mice were purchased from Jackson Laboratory and  
539 housed in the animal facilities at MIT. At age 8-12 weeks old, mice were injected intravenously  
540 via the tail vein with  $5 \times 10^5$  FLuc<sup>+</sup> NALM6 cells. CD4<sup>+</sup> and CD8<sup>+</sup> T cells were prepared separately  
541 as described above, then sorted for EGFP on the day of DynaBead removal; after 4 days of rest,  
542 they were then mixed at a 1:1 ratio. Mice were then treated with  $2 \times 10^5$  or  $1 \times 10^6$  CAR-T cells or  
543 untransduced control T cells intravenously via the tail vein 4 days after NALM6 injection. Tumor  
544 progression was subsequently monitored every 3-7 days using the IVIS Spectrum imaging system  
545 (PerkinElmer) to measure bioluminescent signal after intraperitoneal administration of 0.15 mg of  
546 luciferin substrate per gram of body weight (PerkinElmer 122799). Total photon counts were

547 quantified using LivingImage software. Mice were monitored daily and euthanized upon observing  
548 signs of discomfort or morbidity, graft versus host disease, or as recommended by the  
549 veterinarian. Where indicated, peripheral blood was collected to measure T cell expansion and  
550 persistence by flow cytometry. Red blood cells were lysed from the collected tissues using ACK  
551 Lysing Buffer (Thermo Fisher A1049201) and washed with 1X PBS supplemented with 0.5% BSA  
552 and 2 mM EDTA prior to antibody staining and FACS analysis.

553

#### 554 *Statistical analysis*

555 Statistical analyses were performed using the Prism 9 (GraphPad) software, with the exception  
556 of the single-cell sequencing data which was analyzed in R Studio using base packages or those  
557 described above. Sample sizes were not predetermined using statistical methods. For statistical  
558 comparisons between two groups, significance was determined using two-tailed unpaired  
559 parametric t-tests or nonparametric Wilcoxon Rank Sum tests. For *in vivo* experiments,  
560 differences in overall survival were analyzed using a log-rank test and displayed in a Kaplan-  
561 Meier curve. Adjusted *P* values < 0.05 after multiple hypothesis correction, where required, were  
562 considered statistically significant. The statistical test used for each experiment is noted in the  
563 relevant figure legend.

564

#### 565 *Reporting Summary*

566 Further information regarding study design is available in the Nature Research Reporting  
567 Summary appended to this article.

568

#### 569 *Data Availability*

570 The NGS datasets have been deposited in the Sequence Read Archive and are available under  
571 accession number PRJNA744269, while the scRNA-seq data has been deposited in the Gene  
572 Expression Omnibus under accession number GSE179767. The DomainSeq-processed

573 CARPOOL selection data is available in the GitHub repository at  
574 <https://github.com/birnbaumlabs/Kyung-et-al-2021>. All data generated or analyzed during this  
575 study are included in this published article and its supplementary information files.

576

#### 577 *Code Availability*

578 The code used to analyze the domain composition of selected CARs can be accessed in the  
579 DomainSeq repository at <https://github.com/birnbaumlabs/Kyung-et-al-2021>.

580

## 581 **REFERENCES**

582

- 583 1. Waldman, A. D., Fritz, J. M. & Lenardo, M. J. A guide to cancer immunotherapy: from T cell  
584 basic science to clinical practice. *Nat. Rev. Immunol.* **20**, 651–668 (2020).
- 585 2. Majzner, R. G. & Mackall, C. L. Clinical lessons learned from the first leg of the CAR T cell  
586 journey. *Nat. Med.* **25**, 1341–1355 (2019).
- 587 3. Lesch, S. *et al.* Determinants of response and resistance to CAR T cell therapy. *Semin.*  
588 *Cancer Biol.* **65**, 80–90 (2020).
- 589 4. MacKay, M. *et al.* The therapeutic landscape for cells engineered with chimeric antigen  
590 receptors. *Nat. Biotechnol.* **38**, 233–244 (2020).
- 591 5. Prinzing, B. *et al.* MyD88/CD40 signaling retains CAR T cells in a less differentiated state.  
592 *JCI Insight* **5**, (2020).
- 593 6. Kagoya, Y. *et al.* A novel chimeric antigen receptor containing a JAK-STAT signaling  
594 domain mediates superior antitumor effects. *Nat. Med.* **24**, 352–359 (2018).
- 595 7. Wu, W. *et al.* Multiple Signaling Roles of CD3 $\epsilon$  and Its Application in CAR-T Cell Therapy.  
596 *Cell* **182**, 855–871.e23 (2020).
- 597 8. Feucht, J. *et al.* Calibration of CAR activation potential directs alternative T cell fates and  
598 therapeutic potency. *Nat. Med.* **25**, 82–88 (2019).



- 599 9. Zhong, X.-S., Matsushita, M., Plotkin, J., Riviere, I. & Sadelain, M. Chimeric antigen  
600 receptors combining 4-1BB and CD28 signaling domains augment PI3kinase/AKT/Bcl-XL  
601 activation and CD8+ T cell-mediated tumor eradication. *Mol. Ther.* **18**, 413–420 (2010).
- 602 10. Guedan, S. *et al.* Enhancing CAR T cell persistence through ICOS and 4-1BB  
603 costimulation. *JCI Insight* **3**, (2018).
- 604 11. Zhao, Z. *et al.* Structural Design of Engineered Costimulation Determines Tumor Rejection  
605 Kinetics and Persistence of CAR T Cells. *Cancer Cell* **28**, 415–428 (2015).
- 606 12. Testi, R., Phillips, J. H. & Lanier, L. L. Leu 23 induction as an early marker of functional  
607 CD3/T cell antigen receptor triggering. Requirement for receptor cross-linking, prolonged  
608 elevation of intracellular [Ca<sup>++</sup>] and stimulation of protein kinase C. *The Journal of*  
609 *Immunology* **142**, 1854–1860 (1989).
- 610 13. Ziegler, S. F., Ramsdell, F. & Alderson, M. R. The activation antigen CD69. *Stem Cells* **12**,  
611 (1994).
- 612 14. Underhill, D. M. & Goodridge, H. S. The many faces of ITAMs. *Trends Immunol.* **28**, 66–73  
613 (2007).
- 614 15. Lindner, S. E., Johnson, S. M., Brown, C. E. & Wang, L. D. Chimeric antigen receptor  
615 signaling: Functional consequences and design implications. *Science Advances* **6**,  
616 eaaz3223 (2020).
- 617 16. Hombach, A. A., Heiders, J., Foppe, M., Chmielewski, M. & Abken, H. OX40 costimulation  
618 by a chimeric antigen receptor abrogates CD28 and IL-2 induced IL-10 secretion by  
619 redirected CD4+ T cells. *Oncoimmunology* **1**, 458 (2012).
- 620 17. Zhang, H. *et al.* A chimeric antigen receptor with antigen-independent OX40 signaling  
621 mediates potent antitumor activity. *Sci. Transl. Med.* **13**, (2021).
- 622 18. Wang, E. *et al.* Generation of Potent T-cell Immunotherapy for Cancer Using DAP12-  
623 Based, Multichain, Chimeric Immunoreceptors. *Cancer immunology research* **3**, (2015).
- 624 19. Ng, Y.-Y. *et al.* T Cells Expressing NKG2D CAR with a DAP12 Signaling Domain Stimulate

- 625 Lower Cytokine Production While Effective in Tumor Eradication. *Mol. Ther.* **29**, 75–85  
626 (2021).
- 627 20. Töpfer, K. *et al.* DAP12-Based Activating Chimeric Antigen Receptor for NK Cell Tumor  
628 Immunotherapy. *The Journal of Immunology* **194**, 3201–3212 (2015).
- 629 21. Long, A. H. *et al.* 4-1BB Costimulation Ameliorates T Cell Exhaustion Induced by Tonic  
630 Signaling of Chimeric Antigen Receptors. *Nat. Med.* **21**, 581 (2015).
- 631 22. Ajina, A. & Maher, J. Strategies to Address Chimeric Antigen Receptor Tonic Signaling.  
632 *Mol. Cancer Ther.* **17**, 1795–1815 (2018).
- 633 23. Lynch, D. H. *et al.* Flt3 ligand induces tumor regression and antitumor immune responses in  
634 vivo. *Nat. Med.* **3**, 625–631 (1997).
- 635 24. Sousa, C. R. e. & Böttcher, J. Faculty Opinions recommendation of Expansion and  
636 Activation of CD103( ) Dendritic Cell Progenitors at the Tumor Site Enhances Tumor  
637 Responses to Therapeutic PD-L1 and BRAF Inhibition. *Faculty Opinions – Post-Publication*  
638 *Peer Review of the Biomedical Literature* (2016) doi:10.3410/f.726298594.793520454.
- 639 25. Nagarsheth, N., Wicha, M. S. & Zou, W. Chemokines in the cancer microenvironment and  
640 their relevance in cancer immunotherapy. *Nat. Rev. Immunol.* **17**, 559–572 (2017).
- 641 26. Trifilo, M. J., Bergmann, C. C., Kuziel, W. A. & Lane, T. E. CC chemokine ligand 3 (CCL3)  
642 regulates CD8(+)-T-cell effector function and migration following viral infection. *J. Virol.* **77**,  
643 4004–4014 (2003).
- 644 27. Spranger, S., Bao, R. & Gajewski, T. F. Melanoma-intrinsic  $\beta$ -catenin signalling prevents  
645 anti-tumour immunity. *Nature* **523**, 231–235 (2015).
- 646 28. Philipson, B. I. *et al.* 4-1BB costimulation promotes CAR T cell survival through  
647 noncanonical NF- $\kappa$ B signaling. *Sci. Signal.* **13**, (2020).
- 648 29. Rowe, A. M. *et al.* A cell-intrinsic requirement for NF- $\kappa$ B-inducing kinase in CD4 and CD8 T  
649 cell memory. *J. Immunol.* **191**, 3663–3672 (2013).
- 650 30. Ataide, M. A. *et al.* BATF3 programs CD8+ T cell memory. *Nat. Immunol.* **21**, 1397–1407

- 651 (2020).
- 652 31. Zhou, X. *et al.* Differentiation and Persistence of Memory CD8 T Cells Depend on T Cell  
653 Factor 1. *Immunity* vol. 33 229–240 (2010).
- 654 32. Hänzelmann, S., Castelo, R. & Guinney, J. GSVA: gene set variation analysis for  
655 microarray and RNA-seq data. *BMC Bioinformatics* **14**, 7 (2013).
- 656 33. Boroughs, A. C. *et al.* A Distinct Transcriptional Program in Human CAR T Cells Bearing  
657 the 4-1BB Signaling Domain Revealed by scRNA-Seq. *Mol. Ther.* **28**, 2577–2592 (2020).
- 658 34. Duong, C. P. M. *et al.* Engineering T Cell Function Using Chimeric Antigen Receptors  
659 Identified Using a DNA Library Approach. *PLoS One* **8**, e63037 (2013).
- 660 35. Hartl, F. A. *et al.* Noncanonical binding of Lck to CD3 $\epsilon$  promotes TCR signaling and CAR  
661 function. *Nat. Immunol.* **21**, 902–913 (2020).
- 662 36. Bartelt, R. R., Cruz-Orcutt, N., Collins, M. & Houtman, J. C. D. Comparison of T cell  
663 receptor-induced proximal signaling and downstream functions in immortalized and primary  
664 T cells. *PLoS One* **4**, e5430 (2009).
- 665 37. Abraham, R. T. & Weiss, A. Jurkat T cells and development of the T-cell receptor signalling  
666 paradigm. *Nature Reviews Immunology* vol. 4 301–308 (2004).
- 667 38. Zhao, R., Cui, Y., Li, S., Qin, L. & Li, P. Current status and hurdles for CAR-T cell immune  
668 therapy. *Blood Science* vol. 1 148–155 (2019).
- 669 39. Siegler, E. L. & Wang, P. Preclinical Models in Chimeric Antigen Receptor-Engineered T-  
670 Cell Therapy. *Hum. Gene Ther.* **29**, (2018).
- 671 40. Kato, D. *et al.* GPC1 specific CAR-T cells eradicate established solid tumor without adverse  
672 effects and synergize with anti-PD-1 Ab. (2020) doi:10.7554/eLife.49392.
- 673 41. D'Aloia, M. M., Zizzari, I. G., Sacchetti, B., Pierelli, L. & Alimandi, M. CAR-T cells: the long  
674 and winding road to solid tumors. *Cell Death Dis.* **9**, 1–12 (2018).
- 675 42. Newick, K., Moon, E. & Albelda, S. M. Chimeric antigen receptor T-cell therapy for solid  
676 tumors. *Molecular therapy oncolytics* **3**, 16006 (2016).

- 677 43. Binnewies, M. *et al.* Understanding the tumor immune microenvironment (TIME) for  
678 effective therapy. *Nat. Med.* **24**, 541–550 (2018).
- 679 44. Basar, R., Daher, M. & Rezvani, K. Next-generation cell therapies: the emerging role of  
680 CAR-NK cells. *Blood Adv* **4**, 5868–5876 (2020).
- 681 45. Klichinsky, M. *et al.* Human chimeric antigen receptor macrophages for cancer  
682 immunotherapy. *Nat. Biotechnol.* **38**, (2020).
- 683 46. Stoeckius, M. *et al.* Cell Hashing with barcoded antibodies enables multiplexing and  
684 doublet detection for single cell genomics. *Genome Biol.* **19**, 1–12 (2018).
- 685 47. Stuart, T. *et al.* Comprehensive Integration of Single-Cell Data. *Cell* vol. 177 1888–  
686 1902.e21 (2019).

## 687 **Acknowledgements**

688 We would like to thank the Koch Institute Swanson Biotechnology Center for their technical  
689 support, especially the Flow Cytometry Facility, Animal Facility, Animal Imaging and Preclinical  
690 Testing Facility, MIT BioMicro Center, and High Throughput Sciences Facility. We also thank G.A.  
691 Paradis, P. Chamberlain, H. Holcombe, V. Spanoudaki, S.S. Levine, and B.A. Joughin for many  
692 helpful discussions and suggestions. We also thank Y.Y Chen for providing the sequence for the  
693 19BBζ CAR.

694 This work was funded by grants from the Packard Foundation, the Pew Foundation, the  
695 Deshpande Center, and the National Institutes of Health to M.E.B., and a Fellowship from the  
696 Human Frontier Science Program to T.K. This work was also supported in part by the Mark  
697 Foundation, the NIH (award CA247632), and the Bridge Project, a partnership between the  
698 Koch Institute for Integrative Cancer Research at MIT and the Dana-Farber/Harvard Cancer  
699 Center, along with award Number T32GM007753 from the National Institute of General  
700 Medical Sciences. The content is solely the responsibility of the authors and does not  
701 necessarily represent the official views of the National Institute of General Medical Sciences

702 or the National Institutes of Health. This research is supported in part by the National  
703 Research Foundation, Prime Minister's Office, Singapore under its Campus for Research  
704 Excellence and Technological Enterprise (CREATE) programme, through Singapore MIT  
705 Alliance for Research and Technology (SMART): Critical Analytics for Manufacturing  
706 Personalised-Medicine (CAMP) Inter-Disciplinary Research Group.

707

## 708 **Author information**

### 709 Contributions

710 Conception of project: T.K, M.E.B. Conducting experiments: T.K., K.S.G., C.R.P, A.R., A.Q.Z.,  
711 Y.L., C.K., A.S. Data analysis: T.K., K.S.G., C.R.P, P.V.H, A.R., B.J. Supervision: D.A.L., M.T.H.,  
712 D.J.I., M.E.B. Writing manuscript: T.K., K.S.G., C.R.P., M.E.B. Editing manuscript: All authors

713

## 714 **Ethics declarations**

715 The library approach described in this manuscript is the subject of a US patent application  
716 (US20200325241A1) with T.K. and M.E.B. as inventors. M.E.B. is a founder, consultant, and  
717 equity holder of Virallogic Therapeutics and Abata Therapeutics. T.K. is presently an employee of  
718 Catamaran Bio.
